# Supplementary figures and images for: TP53/mTORC1-mediated bidirectional regulation of PD-L1 modulates immune evasion in hepatocellular carcinoma
Source: PubMed Central journal article supplement — J Immunother Cancer. 2023 Nov 29;11(11):e007479. doi: 10.1136/jitc-2023-007479 (PMC10689408; doi:10.1136/jitc-2023-007479), 2023-11-29

Supplement Figure 4

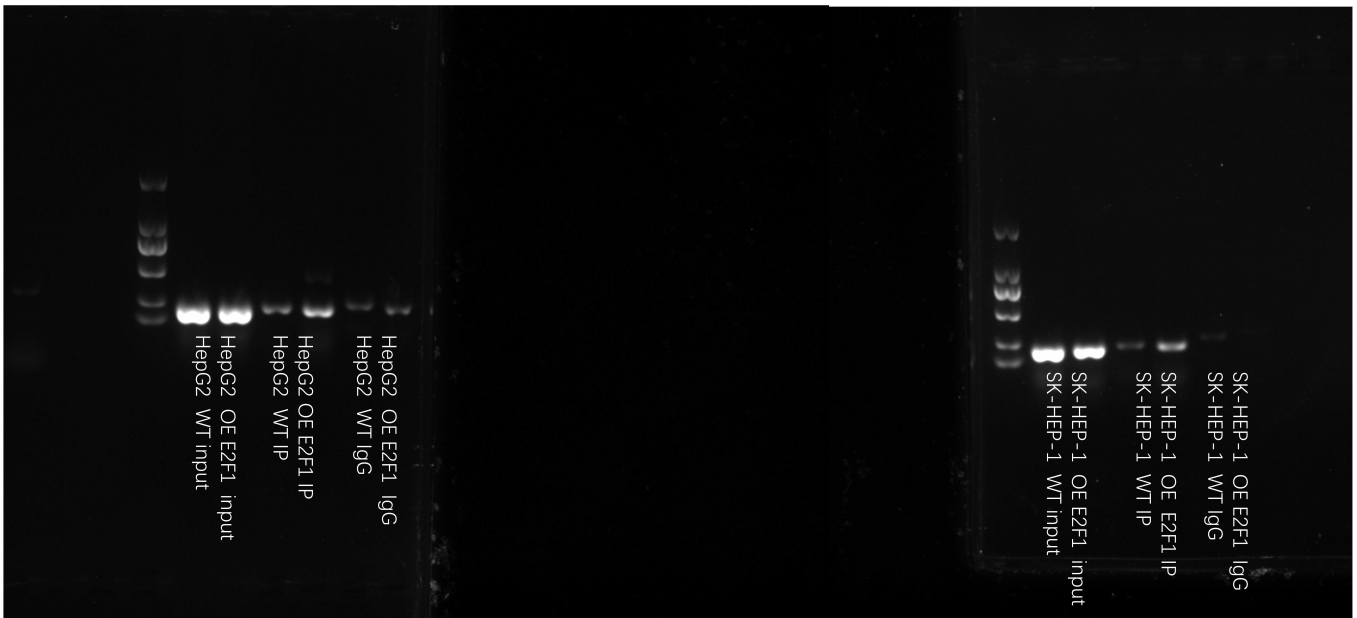

Supplement: jitc-2023-007479supp004.pdf [file jitc-2023-007479supp004.pdf]

Supplement Figure 5

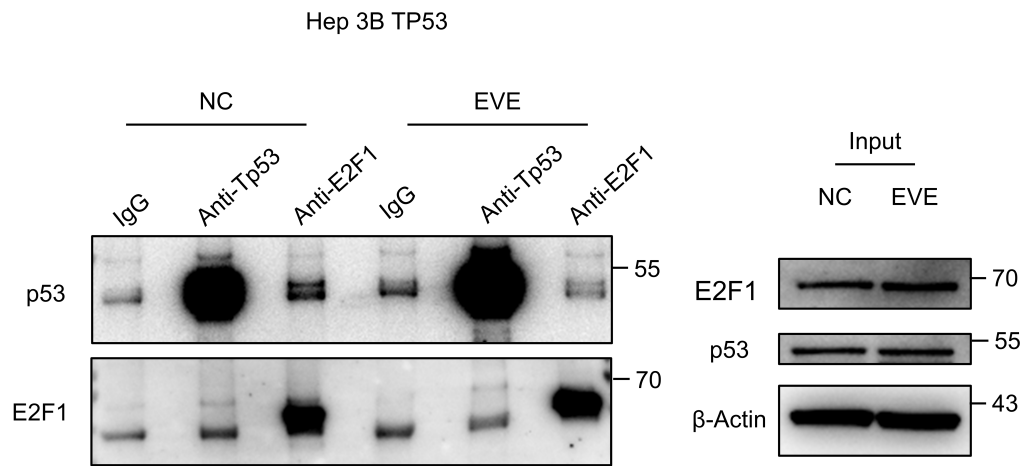

Supplement: jitc-2023-007479supp005.pdf [file jitc-2023-007479supp005.pdf]

Supplement Figure 7

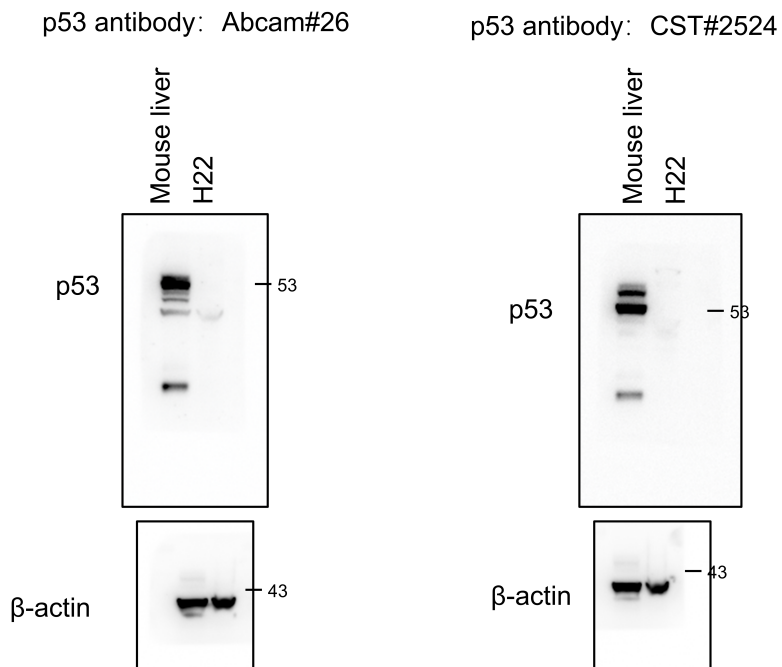

Supplement: jitc-2023-007479supp007.pdf [file jitc-2023-007479supp007.pdf]
